# Supplementary material
Source: PubMed Central journal article supplement (PMC6677403)
Supplement: NIHMS1527805-supplement-2.pdf [file NIHMS1527805-supplement-2.pdf]

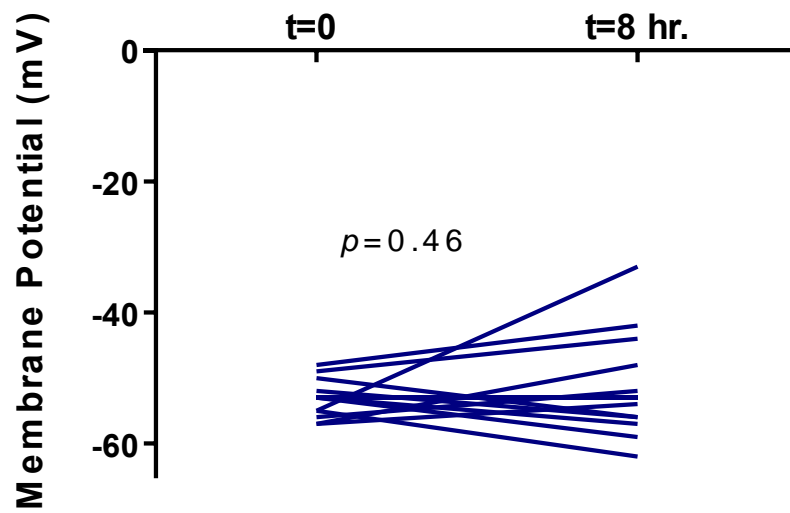

**Figure S1. Resting membrane potential of 12 PD neurons does not change after 8 hr. of impalement with two microelectrodes, Related to Figure 2.** Each line shows the membrane potential measurement of a single neuron at the start of the experiment in TTX (t=0) and then after 8 hr. of two-electrode voltage clamp (t=8). *P* value generated using a two-tailed paired t test.

| <u>Activity-Dependent Correlations</u> | <u>p values</u> |        |         | <u>Pearson's <i>r</i></u> |        |       |
|----------------------------------------|-----------------|--------|---------|---------------------------|--------|-------|
|                                        | Control         | Silent | TEVC    | Control                   | Silent | TEVC  |
| <i>Same slope (Figure 3A)</i>          |                 |        |         |                           |        |       |
| <i>IH vs. BKCa</i>                     | 0.003           | 0.280  | 0.001   | 0.805                     | 0.358  | 0.836 |
| <i>IRK vs. CaV2</i>                    | 0.022           | 0.717  | 0.005   | 0.678                     | -0.132 | 0.746 |
| <i>NALCN vs. CaV2</i>                  | 0.006           | 0.804  | 0.002   | 0.737                     | 0.090  | 0.801 |
| <i>IH vs. SKCa</i>                     | 0.033           | 0.142  | 0.013   | 0.643                     | 0.473  | 0.691 |
| <i>Shaw1 vs. Shaker</i>                | <0.0001         | 0.301  | <0.0001 | 0.879                     | 0.344  | 0.933 |
| <i>Shaw2 vs. CaV2</i>                  | 0.001           | 0.610  | 0.041   | 0.849                     | -0.198 | 0.596 |
| <i>IRK vs. NALCN</i>                   | 0.015           | 0.153  | 0.045   | 0.705                     | -0.462 | 0.586 |
| <i>Shaw2 vs. IRK</i>                   | 0.001           | 0.630  | 0.041   | 0.864                     | -0.174 | 0.596 |
| <i>Shaw2 vs. Shaw1</i>                 | 0.019           | 0.478  | 0.015   | 0.691                     | 0.254  | 0.680 |
| <i>SKCa vs. Shaker</i>                 | 0.003           | 0.068  | 0.001   | 0.772                     | 0.569  | 0.822 |
| <i>Shal vs. IH</i>                     | 0.007           | 0.070  | 0.001   | 0.790                     | 0.566  | 0.846 |
| <i>Shab vs. NALCN</i>                  | 0.036           | 0.255  | 0.012   | 0.607                     | 0.375  | 0.696 |
| <i>Shaw2 vs. Shaker</i>                | 0.041           | 0.315  | 0.003   | 0.622                     | -0.354 | 0.780 |
| <i>BKCa vs. SKCa</i>                   | 0.033           | 0.127  | 0.003   | 0.615                     | 0.490  | 0.801 |
| <i>Different slope (Figure 3B)</i>     |                 |        |         |                           |        |       |
| <i>NALCN vs. Shaker</i>                | <0.0001         | 0.059  | 0.009   | 0.871                     | 0.585  | 0.712 |
| <i>NALCN vs. SKCa</i>                  | 0.001           | 0.182  | 0.021   | 0.838                     | 0.434  | 0.654 |
| <i>Shaker vs. IRK</i>                  | 0.019           | 0.942  | 0.003   | 0.691                     | -0.025 | 0.769 |
| <i>Shaw1 vs. IRK</i>                   | 0.007           | 0.456  | 0.001   | 0.758                     | 0.251  | 0.821 |
| <i>Shaw1 vs. CaV2</i>                  | 0.015           | 0.417  | <0.0001 | 0.855                     | 0.289  | 0.927 |
| <i>NALCN vs. Shaw1</i>                 | <0.0001         | 0.831  | 0.003   | 0.843                     | -0.073 | 0.772 |
| <i>Shaker vs. CaV2</i>                 | 0.018           | 0.102  | <0.0001 | 0.666                     | 0.547  | 0.918 |

**Table S1. Correlated patterns of gene expression that arise due to voltage activity of the membrane, Related to Figure 2 and Figure 3.**

| <u>Feedback-Independent Correlations (Figure 2C<sub>2</sub>)</u> | <i>p</i> values |        |         | Pearson's <i>r</i> |        |       |
|------------------------------------------------------------------|-----------------|--------|---------|--------------------|--------|-------|
|                                                                  | Control         | Silent | TEVC    | Control            | Silent | TEVC  |
| <i>BKKCa vs. NaV</i>                                             | 0.028           | 0.033  | 0.041   | 0.686              | 0.643  | 0.652 |
| <i>Shab vs. CaV2</i>                                             | 0.011           | 0.026  | <0.0001 | 0.701              | 0.695  | 0.932 |
| <i>NaV vs. Shal</i>                                              | 0.014           | 0.010  | 0.023   | 0.775              | 0.735  | 0.673 |
| <i>Shab vs. SKKCa</i>                                            | 0.021           | 0.010  | 0.002   | 0.653              | 0.737  | 0.786 |
| <i>Shaw1 vs. SKKCa</i>                                           | 0.004           | 0.027  | 0.002   | 0.756              | 0.660  | 0.792 |
| <i>Shaw1 vs. Shab</i>                                            | 0.001           | 0.006  | <0.0001 | 0.820              | 0.764  | 0.923 |
| <i>Shal vs. BKKCa</i>                                            | 0.024           | 0.024  | 0.007   | 0.672              | 0.671  | 0.757 |
| <i>Shab vs. Shaker</i>                                           | 0.001           | 0.030  | <0.0001 | 0.814              | 0.650  | 0.922 |

  

| <u>Activity-Independent Correlations</u> | <i>p</i> values |        |       | Pearson's <i>r</i> |        |       |
|------------------------------------------|-----------------|--------|-------|--------------------|--------|-------|
|                                          | Control         | Silent | TEVC  | Control            | Silent | TEVC  |
| Same Trend as Figure 2C <sub>3</sub>     |                 |        |       |                    |        |       |
| <i>CaV2 vs. CaV1</i>                     | <0.0001         | 0.376  | 0.234 | 0.857              | 0.315  | 0.391 |
| <i>IRK vs. CaV1</i>                      | 0.004           | 0.793  | 0.310 | 0.783              | -0.090 | 0.338 |
| <i>Shaw1 vs CaV1</i>                     | 0.015           | 0.071  | 0.549 | 0.680              | 0.564  | 0.203 |
| <i>Shaw2 vs. CaV1</i>                    | <0.0001         | 0.840  | 0.995 | 0.945              | 0.074  | 0.003 |

  

| <u>Activity-Restricted Correlations</u> | <i>p</i> values |         |       | Pearson's <i>r</i> |        |        |
|-----------------------------------------|-----------------|---------|-------|--------------------|--------|--------|
|                                         | Control         | Silent  | TEVC  | Control            | Silent | TEVC   |
| Same Trend as Figure 2C <sub>4</sub>    |                 |         |       |                    |        |        |
| <i>SKKCa vs. CaV1</i>                   | 0.418           | <0.0001 | 0.816 | 0.258              | 0.894  | -0.080 |
| <i>NaV vs. CaV1</i>                     | 0.186           | 0.013   | 0.696 | 0.455              | 0.716  | -0.142 |
| <i>Shab vs CaV1</i>                     | 0.177           | 0.036   | 0.555 | 0.417              | 0.635  | 0.200  |
| <i>NaV vs. IH</i>                       | 0.378           | 0.014   | 0.302 | 0.335              | 0.710  | 0.342  |
| <i>Shal vs. CaV1</i>                    | 0.765           | 0.041   | 0.286 | -0.102             | 0.622  | -0.354 |

**Table S2. Correlated patterns of gene expression that arise as a result of factors other than the naturalistic waveform activity of PD, Related to Figure 2.** *Feedback-Independent Correlations:* Correlated patterns of gene expression that arise independent of voltage activity of the membrane and chemical feedback. *Activity-Independent Correlations:* Correlated relationships that are present in the control group, but eliminated in both TTX (silent) and TTX+Activity (TEVC) groups. *Activity-Restricted Correlations:* Correlated relationships that are present only when activity was suppressed.

| <u>Never Correlated</u> | <u>Became correlated with TTX and TTX + TEVC</u> | <u>Only correlated with TTX+ TEVC</u> |
|-------------------------|--------------------------------------------------|---------------------------------------|
| <i>BKKCa vs. CaV1</i>   | <i>Shab vs. BKKCa</i>                            | <i>CaV2 vs. BKKCa</i>                 |
| <i>BKKCa vs. Shaw 2</i> | <i>NaV vs. CaV2</i>                              | <i>IRK vs. BKKCa</i>                  |
| <i>IH vs. CaV1</i>      | <i>Shal vs. NALCN</i>                            | <i>NALCN vs. BKKCa</i>                |
| <i>NALCN vs. CaV1</i>   | <i>SKKCa vs. NALCN</i>                           | <i>Shaker vs. BKKCa</i>               |
| <i>Shaker vs. CaV1</i>  | <i>SKKCa vs. Shal</i>                            | <i>Shaw1 vs. BKKCa</i>                |
| <i>IH vs. CaV2</i>      | <i>Shaker vs. Shal</i>                           | <i>SKKCa vs. CaV2</i>                 |
| <i>Shal vs. CaV2</i>    | <i>NaV vs. SKKCa</i>                             | <i>Shab vs. IRK</i>                   |
| <i>IH vs. IRK</i>       | <i>Shab vs. NaV</i>                              | <i>NaV vs. NALCN</i>                  |
| <i>IH vs. NALCN</i>     | <i>Shaker vs. NaV</i>                            | <i>Shaw1 vs. Shal</i>                 |
| <i>IH vs. Shab</i>      |                                                  | <i>Shaw2 vs. Shal</i>                 |
| <i>IH vs. Shaker</i>    |                                                  | <i>Shaw1 vs. NaV</i>                  |
| <i>IH vs. Shaw1</i>     |                                                  | <i>Shaw2 vs. NaV</i>                  |
| <i>IH vs. Shaw2</i>     |                                                  | <i>Shaw2 vs. Shab</i>                 |
| <i>Shal vs. IRK</i>     |                                                  |                                       |
| <i>SKKCa vs. IRK</i>    |                                                  |                                       |
| <i>NaV vs. IRK</i>      |                                                  |                                       |
| <i>Shaw2 vs. BKKCa</i>  |                                                  |                                       |
| <i>Shab vs. Shal</i>    |                                                  |                                       |
| <i>Shaw2 vs. SKKCa</i>  |                                                  |                                       |

**Table S3. Channel pairs that were never correlated, became with either TTX or TTX+TEVC, or were only correlated with TTX+TEVC, Related to Figure 2.**

| <u>Became correlated with TTX and<br/>TTX + TEVC</u> | <u>Significant difference between<br/>slopes?</u> | <u>ANCOVA p value</u> |
|------------------------------------------------------|---------------------------------------------------|-----------------------|
| <i>Shab vs. BKCa</i>                                 | No                                                | 0.299                 |
| <i>NaV vs. CaV2</i>                                  | Yes                                               | 0.044                 |
| <i>Shal vs. NALCN</i>                                | No                                                | 0.560                 |
| <i>SKKCa vs. Shal</i>                                | Yes                                               | 0.021                 |
| <i>Shaker vs. Shal</i>                               | No                                                | 0.109                 |
| <i>NaV vs. SKKCa</i>                                 | No                                                | 0.225                 |
| <i>Shab vs. NaV</i>                                  | No                                                | 0.227                 |
| <i>Shaker vs. NaV</i>                                | No                                                | 0.146                 |

**Table S4. ANCOVA results for correlations that emerged after loss of inputs with or without activity, Related to Figure 2.**

| Target        | Forward Primer          | Reverse Primer         | Probe                         | Labeling                   | Efficiency |
|---------------|-------------------------|------------------------|-------------------------------|----------------------------|------------|
| <i>NALCN</i>  | TCGCTTCCACGGTGTACATTC   | GCGGTGCCTTTGTTCTCAG    | TCTTCGTCTTCCTTGGCTGCATGA      | FAM-BHQ1                   | 97.1       |
| <i>IRK</i>    | TACAGTGGCGTTGGACTCTAC   | TCCACCACACCAAGGCAAATAG | TCGTGTTGCGTATGTCATTATCAGC     | CAL Fluor Red<br>610-BHQ2  | 93.9       |
| <i>IH</i>     | TCGGTGCCACTAGACTACATC   | GACCCGCGTGGAGAATCTG    | TCCTCATCTTCAACCAGGACTTCAGC    | Quasar 670-BHQ2            | 95.9       |
| <i>SKKCa</i>  | GCATCGGAGCATTGAACAGAA   | GCCCGGACAGATAGTCATCAG  | CAACTTCAACACTCGGTTTGCCTCAA    | Quasar 705-BHQ2            | 96.1       |
| <i>Shaw1</i>  | CGCGTCACTCCTCAGGACTT    | CCCAGCACCAGGAAGAACAC   | TGATACAGACTTTCGGTGCATCCGC     | Quasar 705-BHQ2            | 87.4       |
| <i>Shaw2</i>  | GAACGCCATCAAGCACTATCATC | ATGGCGCCCGACAGCTTAG    | TGGCTTGAAGGACGGTCTCACA        | Quasar 670-BHQ2            | 91.5       |
| <i>CbNaV</i>  | TCAACGGGAGGTACCATAAGTG  | TCGCTGTTCACCAAGAGTAG   | CGGAGGGATTGAAGCTCAACGCA       | CAL Fluor Red<br>610-BHQ2  | 81         |
| <i>Shaker</i> | GAGGCTCAGAAGACCAGTCAAC  | TGGCGATATCACCGAGCTCAT  | CACTCGATGTCTTCGCGGAGGAGAT     | CAL Fluor Gold<br>540-BHQ1 | 90.7       |
| <i>Shab</i>   | GAGCCGGACAGACAGGAAC     | TGCGCCTCCTTCTGTAGTC    | AAGAACCACGAACACCACATGGGTC     | FAM-BHQ1                   | 93.5       |
| <i>CaV1</i>   | CCAGGCCTTCTACTGGCTCATT  | GCTGGCGATAGTGCTCACTG   | TGTGCTCGTCTTCCTCAACACGG       | FAM-BHQ1                   | 96         |
| <i>CaV2</i>   | ATCCGGCGGACAGTAAAGC     | GTTCCGGCAGCAACACAAC    | TGGTTCTACTGGTTCGTCATCATACTTGT | CAL Fluor Gold<br>540-BHQ1 | 97.9       |
| <i>Shal</i>   | GACACCACCTTACCTCCATTC   | GAACCATGTCCCGTATCCTA   | CGGCGTTTTGGTACACCATTGTCAC     | Quasar 670-BHQ2            | 110.7      |
| <i>BKKCa</i>  | GCTCAAACCTCGGCTTCATTG   | CTGCGTGTCTGGAGAAGTTT   | AGAATCCCGCGCTAAACATGACT       | Quasar 705-BHQ2            | 96         |
| <i>vGluT</i>  | GCGTTCGTGGACCTTCTAC     | TCAGCCACCCTGTAATGGAA   | ATCACAGCCAACCTACTTCAGCGAG     | CAL Fluor Gold<br>540-BHQ1 | 95.3       |
| <i>ChAT</i>   | GGACCGCCTGGCTAAGTAC     | TCGCGGAGTCCATAAGG      | AGGCGGCGCTCAAGCTTCAGAC        | CAL Fluor Red<br>610-BHQ2  | 93.1       |
| <i>vAChT</i>  | GCGTCAGCTGCTTCTTCT      | CAGCAGTGCCGTGTCTATGAG  | TTCGCCAGCAACTACTGGGTGTT       | Quasar 670-BHQ2            | 92.8       |
| <i>ACHE</i>   | GGGCAACATGGGCATGTAC     | GGTCACCACCGAAGAATCAATG | AGGCGCTGGCCATCAAGTGGATAC      | Quasar 705-BHQ2            | 94.2       |

**Table S5. Primers and probes used for multiplex qRT-PCR, Related to STAR Methods.**  
Each box in the table represents a group of genes that were multiplexed in a single PCR run.
